# Supplementary material for: Virulence factor landscape of a Staphylococcus aureus sequence type 45 strain, MCRF184
Source: PubMed Central journal article supplement (PMC6368776; doi:10.1186/s12864-018-5394-2), 2019-02-08

Supplemental Figure 1A. Amino acid sequences of Phenol Soluble Modulins (PSMs) of *S. aureus* MCRF184

|                |                                               |    |
|----------------|-----------------------------------------------|----|
| PSM $\alpha$ 1 | MGIIAGIIKVIKSLIEQFTGK                         | +1 |
| PSM $\alpha$ 2 | MGIIAGIIKFIKGLIEKFTGK                         | +2 |
| PSM $\alpha$ 3 | MEFVAKLFKFFKDLLGKFLGNN                        | +1 |
| PSM $\alpha$ 4 | MAIVGTIIKI IKAIIDIFAK                         | +2 |
| PSM $\beta$ 1  | MEGLFNAIKDTVTAAINNDGAKLGTSTIVSIVENGVLLGKIFGF  | -2 |
| PSM $\beta$ 2  | MTGLAEAIANTVQAAQQHDSVKLGTSTIVDIVANGVGLIGKIFGF | -1 |

Supplemental Figure 1B. Genomic locations of Phenol Soluble Modulins (PSMs) of *S. aureus* MCRF184.

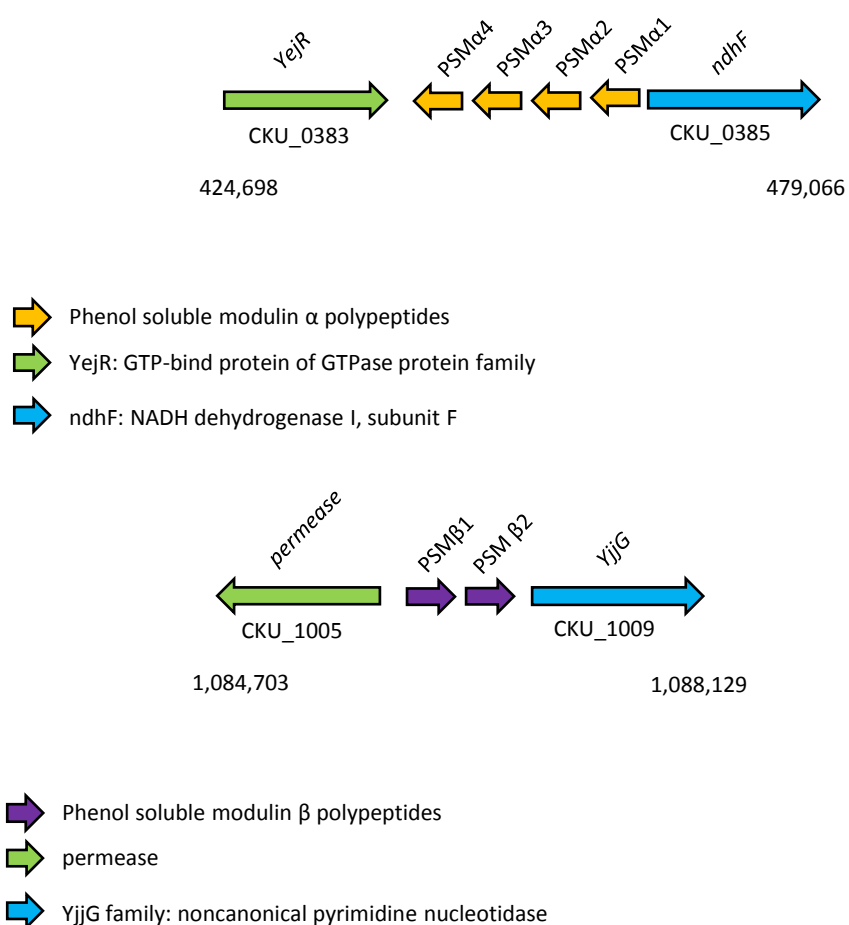

Supplemental Figure 1C. Predicted protein structures of Phenol Soluble Modulins (PSMs) of *S. aureus* MCRF184.

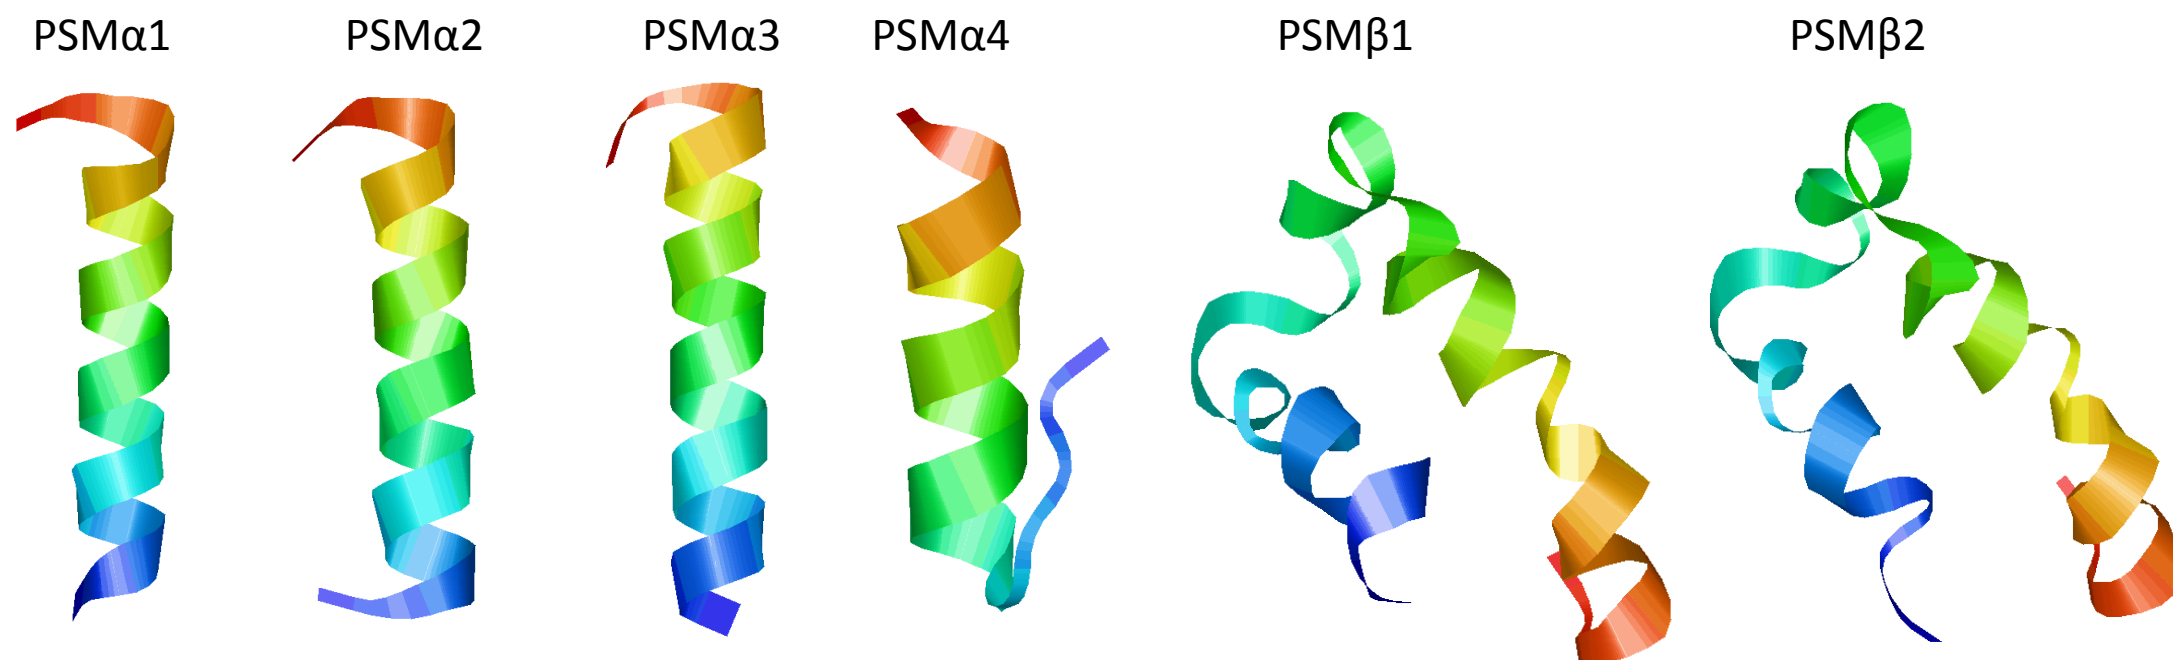

Supplement: 12864_2018_5394_MOESM1_ESM.pdf [file 12864_2018_5394_MOESM1_ESM.pdf]
